# Supplementary material for: Seismic Monitoring of Post-wildfire Debris Flows Following the 2019 Museum Fire, Arizona
Source: Frontiers journal article supplement (doi:10.3389/feart.2021.649938), 2021-04-13
Supplement: Data_Sheet_1.PDF [file Data_Sheet_1.PDF]

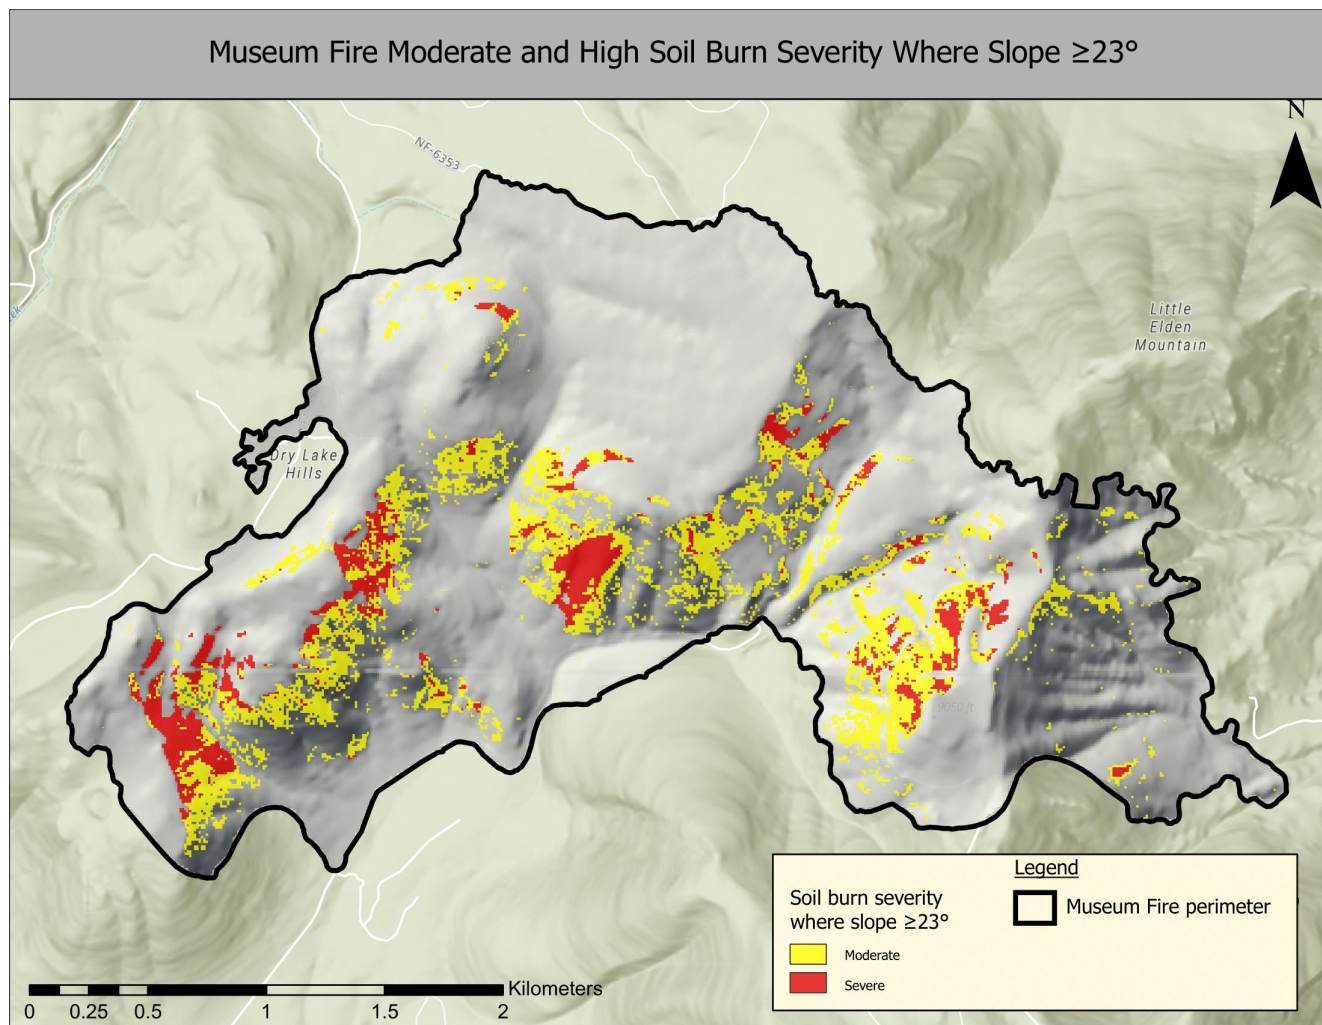

Figure S1: Museum Fire burn scar where moderate and severe soil burn severity intersect with slope angles  $\geq 23^\circ$ , representing where there is higher post-fire debris flow probability.
